# Supplementary material
Source: publisher site journal article supplement (http://www.kjim.org/upload/media/kjim-2020-656-suppl1.pdf)
Supplement: Supplementary file 1 [file kjim-2020-656-suppl1.pdf]

**Supplementary Table 1. Clinical characteristics of pneumonia patients in Korea (2019)**

| Characteristic          | Total<br>(n = 179,265) | Non-ARB/ACEI<br>(n = 143,583) | ARB<br>(n = 33,626) | ACEI<br>(n = 2,056) | p value  |
|-------------------------|------------------------|-------------------------------|---------------------|---------------------|----------|
| Age, yr                 | 38.93 ± 36.33          | 29.46 ± 34.10                 | 77.15 ± 11.27       | 74.90 ± 19.14       | < 0.0001 |
| 0–19                    | 87,763 (48.96)         | 87,651 (61.05)                | 12 (0.04)           | 100 (4.86)          | < 0.0001 |
| 20–59                   | 16,913 (9.43)          | 14,245 (9.92)                 | 2,572 (7.66)        | 96 (4.66)           |          |
| 60–79                   | 36,507 (20.36)         | 21,112 (14.71)                | 14,581 (43.36)      | 814 (39.59)         |          |
| ≥ 80                    | 38,082 (21.24)         | 20,575 (14.33)                | 16,461 (48.95)      | 1,046 (50.88)       |          |
| Female sex              | 88,560 (49.40)         | 70,831 (49.33)                | 16,938 (50.37)      | 791 (38.87)         | < 0.0001 |
| <b>Comorbidity</b>      |                        |                               |                     |                     |          |
| Any 1 comorbidity       | 88,509 (47.70)         | 50,167 (34.94)                | 33,323 (99.10)      | 2,019 (98.20)       | < 0.0001 |
| Hypertension            | 59,729 (33.32)         | 25,007 (17.42)                | 32,809 (95.57)      | 1,913 (93.04)       | < 0.0001 |
| Diabetes mellitus       | 41,868 (23.36)         | 20,511 (14.29)                | 20,161 (59.96)      | 1,196 (58.17)       | < 0.0001 |
| Coronary artery disease | 22,761 (12.70)         | 10,021 (6.98)                 | 11,656 (34.66)      | 1,084 (52.72)       | < 0.0001 |
| Heart failure           | 17,568 (9.80)          | 7,679 (5.35)                  | 8,868 (26.37)       | 1,021 (49.66)       | < 0.0001 |
| Stroke                  | 19,800 (11.05)         | 9,664 (6.73)                  | 9,554 (28.41)       | 582 (28.31)         | < 0.0001 |
| COPD                    | 45,053 (25.13)         | 28,983 (20.19)                | 15,094 (44.89)      | 976 (47.47)         | < 0.0001 |
| Cancer (any)            | 12,390 (6.91)          | 7,265 (5.06)                  | 4,792 (14.25)       | 333 (16.20)         | < 0.0001 |
| Chronic kidney disease  | 6,389 (3.56)           | 2,063 (1.44)                  | 4,042 (12.02)       | 284 (13.81)         | < 0.0001 |
| <b>Medications</b>      |                        |                               |                     |                     |          |
| ARBs                    | 33,626 (18.76)         | -                             | 33,626 (100)        | -                   |          |
| ACEIs                   | 2,056 (1.15)           | -                             | -                   | 2,056 (100)         |          |
| Death within 60 days    | 13,284 (7.41)          | 7,612 (5.30)                  | 5,243 (15.59)       | 2,056 (20.87)       | < 0.0001 |

Values are presented as mean ± standard deviation or number (%).

ARB, angiotensin receptor blocker; ACEI, angiotensin-converting enzyme inhibitor; COPD, chronic obstructive pulmonary disorder.
